# Supplementary material
Source: Elsevier journal article supplement (https://www.sciencedirect.com/science/article/pii/S0375090618301319)
Supplement: mmc1 [file S0375090618301319:mmc1.docx]

**Anexo 1.** Encuesta sobre uso de probióticos en México

Genero

Masculino

Femenino

¿Qué edad tiene usted?

0 a 99

Año en que obtuvo la licenciatura

1915 a 2015

¿Cuál de las siguientes define mejor su actividad profesional?

Medicina

Nutriología

Enfermería

Odontología

Microbiología

Química

Otra

Ninguna

¿Tiene algún estudio de postgrado?

Especialidad

Maestría

Doctorado

Postdoctorado

Ninguno

Años que usted tiene practicando atención a pacientes

0 – 5 años

6 -10 años

11 – 15 años

16 a 20 años

21 a 25 años

26 a 30 años

>30 años

No atiendo pacientes

¿Cuál de las siguientes define mejor su práctica clínica?

Privada

Institucional (Sector salud)

Ambas

¿Qué tipo de pacientes usted atiende?

Niños

Adultos

Tercera edad

Todos los anteriores

No atiendo pacientes

¿Qué es un probiótico?

a) Son los bacilos de productos lácteos fermentados que confieren un beneficio a la salud

b) Ingredientes fermentables que promueven el crecimiento de la microbiota intestinal

c) Microorganismos vivos que confieren un beneficio a la salud

d) Son medicamentos o suplementos alimenticios que favorecen la salud

¿Usted recomienda el uso de probióticos?

Siempre

Frecuentemente

Algunas veces

Rara vez

Nunca (Si nunca, pase a la pregunta número 9)

¿Cuál de los siguientes enunciados justifica mejor su recomendación para el uso de probióticos?

Son necesarios para mantener un buen estado de salud

Son útiles para la prevención de enfermedades

Son efectivos en el tratamiento de algunas enfermedades

Otras

¿Usted considera que los probióticos mejoran los síntomas digestivos?

Totalmente de acuerdo

Parcialmente de acuerdo

Parcialmente en desacuerdo

Totalmente en desacuerdo

No sé

¿Usted considera que los probióticos pueden usarse en el tratamiento de enfermedades gastrointestinales?

Totalmente de acuerdo

Parcialmente de acuerdo

Parcialmente en desacuerdo

Totalmente en desacuerdo

No sé

¿En cuál(es) de las siguientes enfermedades gastrointestinales la evidencia científica apoya el uso de probióticos?

a) Síndrome de intestino irritable Si No No sé

b) Colitis ulcerativa crónica inespecífica Si No No sé

c) Enfermedad de Crohn Si No No sé

d) Pouchitis Si No No sé

f) Enteritis por radiación Si No No sé

g) Infección por *C.difficile* Si No No sé

h) Diarrea aguda Si No No sé

i) Diarrea asociada a antibióticos Si No No sé

j) Enterocolitis necrotizante Si No No sé

k) Cólico del lactante Si No No sé

l) Otras (abrir cuadro de texto)

De la siguiente lista de productos comerciales en México, por favor seleccione los 3 que Usted recomienda con mayor frecuencia.

Yakult

Activia

Gastroprotect

ProTflor

Nombre

SENEX-3

NEOFLOR

FLORATIL

Enterogermina

Lacteol Fort

Sinuberase

Zir Fos

PROBIO HP+

Biogaia

Lacteo Cron

Lactipan

Liolactil

Pro-T-Flor

Rebiot E

Pearls

Con base en su respuesta a la pregunta anterior, por favor seleccione la siguiente lista, las 3 especies y cepas de probióticos que Ud. recomienda con mayor frecuencia

Combinación *de Lactobacillus Rosell-52*

*Enterococcus faecium cepa Cernelle 68 (SF68)*

*Saccharomyces boulardii*

*Lactobacillus La1*

*Bacillus clausii*

Combinación *de Lactobacillus fermentum y Lactobacillus delbrueckii*

*Casei shirota*

*Lactobacillus sporogenes*

*Bifidobacterium animalis*

*Bifidobacterium longum W11*

Combinación *de Lactobacillus acidophilus La5, bifidobacterium lactis Bb12*

*Lactobacillus reuteri protectis DSM 17938*

Combinación *de Lactobacillus fermentum y Lactobacillus delbrueckii*

Combinación *de Lactobacillus acidophilus, Lactobacillus casei, Lactobacillus rhamnosus, Lactobacillus plantarum, Bifidobacterium infantis, Streptococcus thermophilus*

*Lactobacillus casei variedad rhamnosus*

Combinación *de Lactobacillus acidophilus, Bifidobacterium lactis y Lactobacillus casei*

Cuando elige un probiótico, por favor seleccione el factor que Ud considera como el más importante para su recomendación o prescripción

Costo y presentación del producto

Contiene mayor variedad de cepas y número de microorganismos vivos

Contiene la cepa específica ensayada en el estudio clínico para el síntoma o enfermedad específica

Control de calidad y ética de la industria o empresa que lo produce

Amplia disponibilidad y precio accesible del producto

Otras

¿Usted considera que el uso de probioticos es seguro y no confiere riesgos para la salud?

Totalmente de acuerdo

Parcialmente de acuerdo

Parcialmente en desacuerdo

Totalmente en desacuerdo

No sé

Si Usted NO recomienda probióticos en enfermedades gastrointestinales, por favor escoja la razón que define mejor su conducta

Desconozco la evidencia de los probióticos en el tratamiento de enfermedades digestivas

Considero que la evidencia es insuficiente para el uso de probióticos en la práctica clínica

Considero que los probióticos son menos efectivos o no ofrecen beneficios adicionales a los tratamientos específicos

Costo

Otras (Cuadro de texto)

Usted consume regularmente (más de 3 veces a la semana en el último mes) algún alimento, suplemento o medicamento con probióticos

Si

No
